# Supplementary material for: Recycled arc mantle recovered from the Mid-Atlantic Ridge
Source: Nat Commun. 2020 Aug 4;11:3887. doi: 10.1038/s41467-020-17604-8 (PMC7403410; doi:10.1038/s41467-020-17604-8)
Supplement: Supplementary file 8 — Supplementary Data 5 [file 41467_2020_17604_MOESM8_ESM.xlsx]

## Sheet: Sheet1
			Anhydrous Melting											Hydrous Melting
			Partition Coefficients						Cpx-out (F%), Grt/Sp	Ti (µg/g) at Cpx-out	Yb (µg/g) at Cpx-out				Partition Coefficients
		Bulk Starting Concentration (µg/g)	Olivine	Cpx (Sp)	Cpx (Grt)	Opx	Spinel	Garnet				Literature Source			Olivine	Cpx (Sp)	Cpx (Grt)	Opx	Spinel	Garnet	Literature Source	Notes
	Yb	0.365	0.014	0.41	1.43	0.09	0.005					Hellebrand et al. 2002 after Suhr et al. 1998 and Blundy et al. 1998		Yb	0.023	0.47*	1.43	0.116	0.005	7.4	Mcdade et al. 2003, Johnson et al. 1998, Yao et al. 2012, Blundy et al. 1998	*Calc from Sun and Liang 2012 using mean 16ºN Cpx composition and 3.5% melt H2O
	Ti	716.3	0.015	0.35	0.71	0.1	0.15					Hellebrand et al. 2002 after Suhr et al. 1998 and Blundy et al. 1998		Ti	0.01	0.296	0.296	0.141	0.15	0.29	Johnson et al. 1998, Mcdade et al. 2003
			Starting Mineral Modes												Starting Mineral Modes
	Initial mineral modes (Grt Field)		0.57	0.13		0.21		0.09				Calc after Hellebrand et al. (2002)		Initial mineral modes (Grt Field)	0.57	0.13		0.21		0.09	Calc after Hellebrand et al. (2002)
	Initial mineral modes (Sp Field)		0.57	0.13		0.28	0.02					Workman and Hart 2005		Initial mineral modes (Sp Field)	0.57	0.13		0.28	0.02		Workman and Hart 2005
	Grt to Sp coefficients		-0.444	0.444		0.666	0.333	-1				Rxn of Johnson et al. 1990		Grt to Sp coefficients	-0.444	0.444		0.666	0.333	-1
			Melting modes												Melting modes
		Spinel Field Only, W&H05 Min Modes	-0.22	0.71		0.38	0.13		0.18	258	0.13	Baker and Stolper 1994		Spinel Field	-0.1	0.56		0.52	0.02		Bizimis et al. 2000, After Gaetani and Grove 1998
			-0.347	0.735		0.571	0.041		0.19	204	0.11	Wasylenki et al. 2003		Garnet Field	0.09	0.49		-0.13		0.64	Grove and Till 2019, High-T
			-0.06	0.67		0.28	0.11		0.19	204	0.11	Exp. L62-L63, Kinzler 1997
			-0.13	0.89		0.13	0.12		0.14	546	0.37	Exp. L134-L138, Kinzler 1997		Model Solution
		Garnet Field	0.04		1.05	-0.19		0.11				Walter 1998			Olivine	Opx	Cpx	Sp
														Observed Mineral Modes (mean)	0.755	0.227	0.006	0.012
		Grt+Cpx Melting							4/21	193	0.143	Grt: Walter 1998, Sp: Kinzler 1997, L134-L138		Calculated Mineral Modes	0.762	0.205	0.01	0.013
									2/22	218	0.147	Grt: Walter 1998, Sp: Baker and Stolper 1994		F Garnet (%)	8
									3/21	211	0.143	Grt: Walter 1998, Sp: Wasylenki et al. 2003		F Spinel (%)	22
									5/19	227	0.181	Grt: Walter 1998, Sp: Kinzler 1997, L62-L63		Ti µg/g Model	71
														Ti µg/g Obs (mean)	72.5
														Yb µg/g Model	0.199
														Yb µg/g Obs (mean)	0.2196
Partition Coefficients
Hellebrand, E., et al. (2002). "Garnet-field melting and late-stage refertilization in 'residual' abyssal peridotites from the Central Indian Ridge." Journal of Petrology 43(12): 2305-2338.
Suhr, G., et al. (1998). "Infiltration of refractory melts into the lowermost oceanic crust: evidence from dunite- and gabbro-hosted clinopyroxenes in the Bay of Islands ophiolite." Contributions to Mineralogy and Petrology 131(2-3): 136-154.
Blundy, J. D., et al. (1998). "Heavy REE are compatible in clinopyroxene on the spinel lherzolite solidus." Earth and Planetary Science Letters 160(3-4): 493-504.
McDade, P., et al. (2003). "Trace element partitioning between mantle wedge peridotite and hydrous MgO-rich melt." American Mineralogist 88(11-12): 1825-1831.
Johnson, K. T. M. (1998). "Experimental determination of partition coefficients for rare earth and high-field-strength elements between clinopyroxene, garnet, and basaltic melt at high pressures." Contributions to Mineralogy and Petrology 133(1-2): 60-68.
Yao, L. J., et al. (2012). "A parameterized model for REE distribution between low-Ca pyroxene and basaltic melts with applications to REE partitioning in low-Ca pyroxene along a mantle adiabat and during pyroxenite-derived melt and peridotite interaction." Contributions to Mineralogy and Petrology 164(2): 261-280.
Sun, C., & Liang, Y. (2012). Distribution of REE between clinopyroxene and basaltic melt along a mantle adiabat: effects of major element composition, water, and temperature. Contributions to Mineralogy and Petrology, 163(5), 807-823.
Initial mineral modes
Workman RK, Hart SR (2005) Major and trace element composition of the depleted MORB mantle (DMM). Earth and Planetary Science Letters 231:53–72. doi: 10.1016/j.epsl.2004.12.005
Melting modes
Baker, M. B. and E. M. Stolper (1994). "Determining the Composition of High-Pressure Mantle Melts Using Diamond Aggregates." Geochimica Et Cosmochimica Acta 58(13): 2811-2827.
Wasylenki LE (2003) Near-solidus Melting of the Shallow Upper Mantle: Partial Melting Experiments on Depleted Peridotite. Journal of Petrology 44:1163–1191. doi: 10.1093/petrology/44.7.1163
Kinzler, R. J. (1997). "Melting of mantle peridotite at pressures approaching the spinel to garnet transition: Application to mid‐ocean ridge basalt petrogenesis." Journal of Geophysical Research: Solid Earth 102(B1): 853-874.
Walter, M. J. (1998). "Melting of garnet peridotite and the origin of komatiite and depleted lithosphere." Journal of Petrology 39(1): 29-60.
Bizimis, M., et al. (2000). "Trace and REE content of clinopyroxenes from supra-subduction zone peridotites. Implications for melting and enrichment processes in island arcs." Chemical Geology 165(1-2): 67-85.
Grove, T. L. and C. B. Till (2019). "H 2 O-rich mantle melting near the slab–wedge interface." Contributions to Mineralogy and Petrology 174(10): 80.
Gaetani, G. A. and T. L. Grove (1998). "The influence of water on melting of mantle peridotite." Contributions to Mineralogy and Petrology 131(4): 323-346.
Initial bulk rock Yb and Ti abundances
Workman RK, Hart SR (2005) Major and trace element composition of the depleted MORB mantle (DMM). Earth and Planetary Science Letters 231:53–72. doi: 10.1016/j.epsl.2004.12.005
Table S3
Title:
Melting model parameters
